# Supplementary material for: The metabolic profile of a rat model of chronic kidney disease
Source: PeerJ. 2017 May 23;5:e3352. doi: 10.7717/peerj.3352 (PMC5444364; doi:10.7717/peerj.3352)
Supplement: Supplemental Information 5 [file peerj-05-3352-s005.xlsx]

## Sheet: Sheet1
No.	Group	Ct-18S	Oxoglutarate Dehydrogenase 1F2R	CtDiff	OgDh 1F2R	SuccinylCoASynthetaseAlpha1F2R	CtDiff	SucCoASyntAlpha	CitrateSynthase	CtDiff	CitrateSynthase	Aconitase2	CtDiff	Aconitase2	Fumarase	CtDiff	Fumarase	MalateDehydrogenase2	CtDiff	MalateDehydrogenase2
1	1.11wLS	13.358	24.971	11.613	0.866082	27.4244	14.0664	0.714012	28.0977	14.7397	0.88213	26.6189	13.2609	0.789083	26.8591	13.5011	0.841637	27.6804	14.3224	0.585229
2	1.11wLS	13.8184	25.0538	11.2354	1.12518	27.3823	13.5638	1.01155	28.1711	14.3527	1.1535	26.6802	12.8617	1.04058	26.9725	13.1541	1.07048	27.7127	13.8943	0.787427
3	1.11wLS	13.4341	24.9766	11.5424	0.909485	27.0975	13.6634	0.944099	28.1517	14.7175	0.895771	26.4868	13.0527	0.91157	26.799	13.3648	0.925001	27.368	13.9339	0.766118
4	1.11wLS	13.5842	24.926	11.3418	1.0452	27.1629	13.5787	1.00117	28.1433	14.559	0.999805	26.5036	12.9194	0.999812	26.8091	13.2249	1.01924	27.3311	13.7468	0.872164
5	1.11wLS	13.4237	24.9934	11.5697	0.892427	27.2407	13.817	0.848713	27.9871	14.5634	0.996747	26.5034	13.0797	0.894655	26.7912	13.3675	0.9233	26.9902	13.5664	0.988331
6	1.11wLS	13.5113	25.2306	11.7193	0.804529	27.0086	13.4974	1.05923	28.632	15.1207	0.677364	27.0246	13.5133	0.66242	27.0983	13.587	0.792993	26.8723	13.361	1.13961
7	1.11wLS	14.0884	24.7324	10.644	1.69534	26.9487	12.8603	1.64731	27.9317	13.8433	1.64196	26.0727	11.9843	1.9116	26.5684	12.4799	1.70813	26.2122	12.1238	2.68641
8	1.11wLS	13.4089	24.9877	11.5788	0.886854	27.005	13.5961	0.989132	27.9823	14.5734	0.989848	26.0898	12.6809	1.17953	26.7485	13.3396	0.941336	26.8563	13.4474	1.07335
9	2.11wHS	13.2722	25.1564	11.8842	0.717627	27.2596	13.9874	0.754191	28.1338	14.8616	0.810619	26.5978	13.3257	0.754431	26.9766	13.7044	0.731011	27.8178	14.5457	0.501329
10	2.11wHS	13.3334	25.1126	11.7792	0.771818	27.214	13.8806	0.812117	28.1394	14.806	0.842485	26.5598	13.2264	0.80817	26.9224	13.589	0.791864	27.6716	14.3382	0.578851
11	2.11wHS	13.3398	24.9677	11.6279	0.857182	26.926	13.5862	0.995954	28.0583	14.7185	0.895148	26.4032	13.0634	0.90483	26.7842	13.4444	0.875346	27.6014	14.2616	0.610445
12	2.11wHS	13.2102	24.7696	11.5594	0.898832	26.9274	13.7173	0.909478	27.8635	14.6533	0.936515	26.3356	13.1254	0.866749	26.6068	13.3966	0.904851	27.1073	13.8971	0.785894
13	2.11wHS	13.6193	25.1248	11.5055	0.93304	26.9202	13.3009	1.21376	28.1444	14.5251	1.02356	26.5519	12.9326	0.990712	26.9425	13.3232	0.952102	27.0225	13.4032	1.1067
14	2.11wHS	13.5215	24.8964	11.3749	1.02147	26.7851	13.2636	1.24552	27.9175	14.396	1.11942	26.2223	12.7008	1.16336	26.6341	13.1127	1.10168	26.6538	13.1323	1.33537
15	2.11wHS	13.3034	24.6493	11.3459	1.0422	26.7855	13.4822	1.07045	27.7669	14.4635	1.06821	26.1339	12.8305	1.06334	26.4435	13.1401	1.08089	26.5822	13.2789	1.20632
16	2.11wHS	13.328	24.7566	11.4286	0.984155	26.9396	13.6115	0.978643	27.9373	14.6092	0.965593	26.3526	13.0245	0.929531	26.8035	13.4755	0.856705	26.9003	13.5723	0.984352
17	2.11wHS	13.4453	24.937	11.4917	0.942026	26.9683	13.5229	1.04061	27.9536	14.5082	1.03561	26.4067	12.9614	0.9711	26.8111	13.3658	0.924405	27.3313	13.886	0.791949
18	2.11wHS	13.4346	24.8989	11.4643	0.960091	26.8903	13.4557	1.09025	27.9036	14.469	1.06416	26.2066	12.772	1.10733	26.6521	13.2174	1.0245	27.4494	14.0148	0.724328
19	2.11wHS	13.1328	24.5503	11.4174	0.991784	26.7646	13.6318	0.964993	27.8235	14.6907	0.912592	26.0755	12.9427	0.98378	26.4138	13.281	0.980346	27.3436	14.2108	0.632317
20	2.11wHS	13.2762	24.8735	11.5973	0.875559	27.1698	13.8936	0.804852	27.9649	14.6886	0.913877	26.4668	13.1906	0.828489	26.7718	13.4956	0.844843	27.5806	14.3044	0.592605
21	3.21wLS	13.2531	25.0392	11.7861	0.768142	27.0994	13.8463	0.831669	28.3168	15.0637	0.704672	26.5296	13.2765	0.780574	26.7895	13.5364	0.821259	27.6388	14.3857	0.560129
22	3.21wLS	13.4121	25.1646	11.7525	0.786254	26.9849	13.5727	1.0053	28.4591	15.0469	0.712904	26.6856	13.2735	0.782205	26.9822	13.5701	0.802343	27.5091	14.097	0.684213
23	3.21wLS	13.3635	25.302	11.9385	0.691147	27.2644	13.9009	0.800798	28.2946	14.931	0.772538	26.6911	13.3276	0.753436	26.9268	13.5633	0.806093	27.319	13.9555	0.754728
24	3.21wLS	13.4645	25.2703	11.8058	0.757716	27.1367	13.6722	0.938308	28.1924	14.7279	0.889337	26.6811	13.2166	0.813671	26.9433	13.4789	0.854694	27.0722	13.6077	0.96047
25	3.21wLS	13.5365	25.0923	11.5558	0.901057	27.0609	13.5245	1.03951	28.3068	14.7703	0.863597	26.4965	12.96	0.972048	26.9285	13.392	0.907724	26.724	13.1875	1.28519
26	3.21wLS	13.6701	25.3756	11.7056	0.812237	27.2545	13.5844	0.997181	28.5605	14.8904	0.794622	26.9141	13.244	0.798366	27.1452	13.4751	0.856919	26.9268	13.2568	1.22497
27	3.21wLS	13.3918	24.933	11.5412	0.910247	27.0542	13.6624	0.944758	28.0552	14.6633	0.930048	26.3482	12.9564	0.974482	26.6994	13.3076	0.962444	26.632	13.2402	1.23909
28	3.21wLS	13.6152	25.0024	11.3872	1.01282	26.9157	13.3005	1.21405	28.1445	14.5293	1.02059	26.3898	12.7746	1.10536	26.8626	13.2474	1.00341	26.9368	13.3216	1.17109
29	4.21wHS	13.3781	25.5789	12.2008	0.576242	27.6843	14.3063	0.604623	28.2493	14.8713	0.805219	26.9259	13.5478	0.646754	27.3768	13.9988	0.596085	27.662	14.2839	0.601064
30	4.21wHS	13.7371	26.3976	12.6605	0.419015	28.079	14.3419	0.589883	28.7783	15.0412	0.715752	27.9418	14.2047	0.410213	28.134	14.3968	0.452349	28.5169	14.7797	0.426245
31	4.21wHS	13.8671	25.6589	11.7918	0.7651	27.3028	13.4357	1.10549	28.8395	14.9724	0.750694	27.0636	13.1965	0.825094	27.3811	13.514	0.834123	27.3786	13.5116	1.02665
32	4.21wHS	13.6282	25.9968	12.3686	0.512952	27.9395	14.3114	0.60249	28.4579	14.8298	0.828714	27.6529	14.0247	0.464715	27.9425	14.3144	0.478965	27.7867	14.1585	0.655651
33	4.21wHS	13.4609	25.3634	11.9025	0.70859	27.4106	13.9497	0.774148	28.2913	14.8305	0.828314	26.7641	13.3032	0.76626	27.3411	13.8803	0.64712	26.8577	13.3969	1.11159
34	4.21wHS	13.8631	26.1956	12.3324	0.525987	28.0725	14.2094	0.646629	28.7717	14.9086	0.784659	27.822	13.9589	0.486411	28.0741	14.211	0.514546	27.7296	13.8665	0.802752
35	4.21wHS	13.5085	25.7711	12.2626	0.552076	27.7738	14.2653	0.622038	28.2242	14.7157	0.896887	27.3581	13.8496	0.524684	27.5712	14.0627	0.570237	27.6102	14.1016	0.682004
36	4.21wHS	13.9814	25.8681	11.8867	0.716415	27.6322	13.6508	0.952359	28.3551	14.3737	1.13684	27.4774	13.496	0.670407	27.7339	13.7525	0.707051	27.7623	13.7809	0.851829
37	4.21wHS	13.9775	25.9498	11.9723	0.675151	28.0108	14.0333	0.730583	28.5634	14.5859	0.981332	27.8011	13.8235	0.534241	27.6737	13.6962	0.735185	28.5115	14.534	0.505414
38	4.21wHS	13.6849	25.2876	11.6028	0.872215	27.6203	13.9355	0.781811	27.7549	14.0701	1.40312	26.7036	13.0187	0.933285	27.1353	13.4504	0.871716	27.5284	13.8436	0.815592
39	4.21wHS	13.3807	25.3146	11.9338	0.693373	27.751	14.3703	0.578392	28.1235	14.7428	0.8802	27.1079	13.7271	0.571159	27.2207	13.84	0.665428	27.9364	14.5557	0.497864
